# Supplementary material for: Development and Characterization of a Genetic Mouse Model of KRAS Mutated Colorectal Cancer
Source: MDPI journal article supplement (doi:10.3390/ijms20225677), 2019-11-13
Supplement: s1 [file s1]

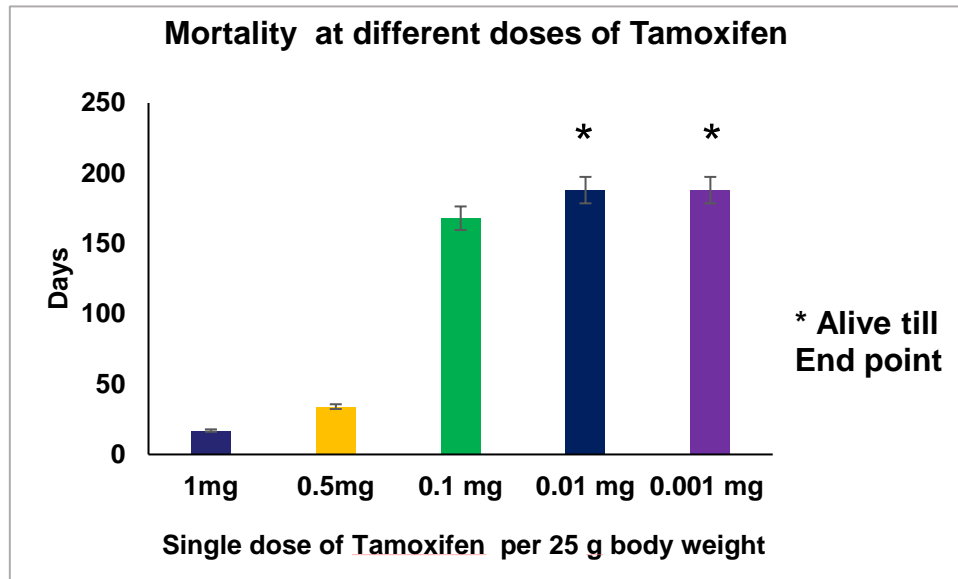

A

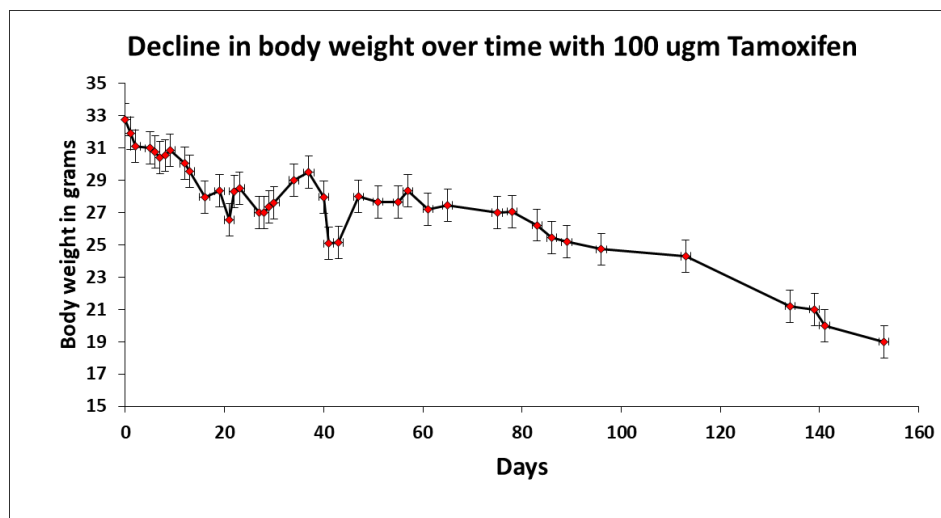

B

**Figure S1.** (A) Titration of KPC: APC animals at different dose of Tamoxifen. \* indicates that the animals were alive till the end point of the study. (B) Is the decline of body weight of KPC: APC mice treated with a single dose of 100 microgram of tamoxifen. The results represent a mean ( $n = 3$ ) animals.

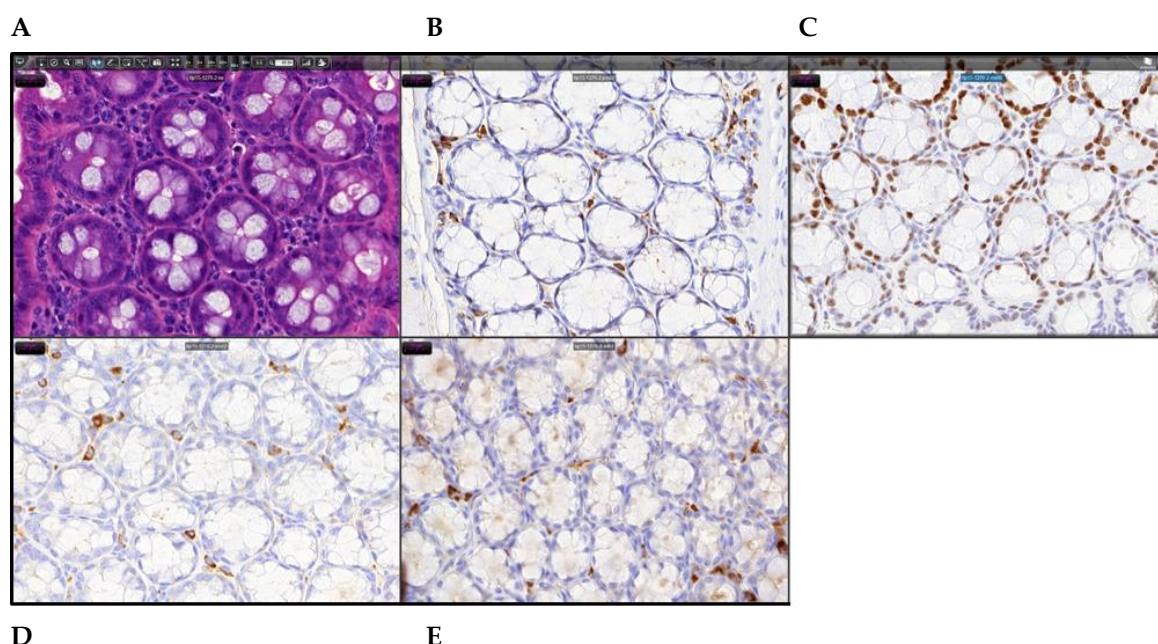

**Figure S2:** Control mouse tissue staining for (A) H & E, (B) PMS2, (C) MSH6, (D) MSH2 and (E) MLH1. No prominent nuclear staining has been observed. The tissue architecture is also intact (40×).

**Figure S3.** PET scan of CDX2 CRE ERT2 and APC f/f (video) showing much lesser degree of overall inflammation and tumor growth but with low SUV (<2.5).

**Figure S4.** KRAS<sup>+/-</sup> and APC f/f (video) post TAM induction showing normal colonic architecture.

**Table S1.** Mean numerical value of apoptosis gene transcripts expression of the negative control and tamoxifen treated groups ( $n = 3$  for each group).

|           |      | PUMA  | BAD   | Bcl2  | Casp2 | Casp3 | Casp7 | Casp8 | Casp9 |
|-----------|------|-------|-------|-------|-------|-------|-------|-------|-------|
| Untreated | Mean | 0.259 | 5.600 | 1.282 | 2.397 | 5.764 | 1.714 | 3.560 | 7.624 |
|           | SEM  | 0.179 | 0.842 | 0.261 | 1.376 | 1.006 | 0.183 | 3.051 | 1.983 |
| Treated   | Mean | 0.987 | 0.409 | 3.794 | 0.704 | 1.334 | 0.152 | 0.273 | 1.014 |
|           | SEM  | 0.157 | 0.137 | 0.024 | 0.679 | 0.239 | 0.079 | 2.272 | 0.466 |

**Table S2.** List of Primer probes used in genotyping service by Transnetxy.

| Probe       | Sequence (5'-3')             |
|-------------|------------------------------|
| KRAS G12D-F | GGCCTGCTGAAAATGACTGAGTATA    |
| KRAS G12D-R | CTGTATCGTCAAGGCGCTCTT        |
| Cre-F       | TTAATCCATATTGGCAGAACGAAAACG  |
| Cre-R       | CAGGCTAAGTGCCTTCTCTACA       |
| Apc Fl/Fl-F | CTGTATCATGGAAAGATAGGTGGTCATT |
| Apc Fl/Fl-R | GTGGTCAAGCTCGATAACTTCGTAT    |

**Table S3.** List of antibodies used for western blot analysis.

| <b>Antibodies</b>          | <b>Company</b>  | <b>Catalogue no.</b> | <b>Clone</b> | <b>Dilution</b> |
|----------------------------|-----------------|----------------------|--------------|-----------------|
| UCH-L1 (C-4)               | Santa Cruz      | sc-271639            | C-4          | 1:200           |
| P-21                       | Santa Cruz      | sc-6246              | F-5          | 1:200           |
| HOX6B                      | Santa Cruz      | sc-166950            | B-12         | 1:100           |
| HDAC-3                     | Santa Cruz      | sc-11417             | H-99         | 1:200           |
| A33                        | Santa Cruz      | sc-398702            | E-8          | 1:200           |
| B-actin                    | Millipore Sigma | A3853                | AC-40        | 1:10000         |
| GAPDH                      | Cell Signaling  | 5174P                | D16H11       | 1:5000          |
| Anti-mouse IgG-HRP linked  | Cell Signaling  | 7076S                | -            | 1:2000          |
| Anti-rabbit IgG-HRP linked | Cell Signaling  | 7074S                | -            | 1:2000          |
| Mouse IgGk BP-HRP          | Santa Cruz      | sc-516102            | -            | 1:5000          |

**Table S4.** List of primers used for RT-qPCR analysis.

| <b>Oligo Name</b> | <b>Tm (°C)</b> | <b>Sequence (5'-3')</b> |
|-------------------|----------------|-------------------------|
| GAPDH-F           | 66.3           | TCACCACCATGGAGAAGGC     |
| GAPDH-R           | 66.3           | GCTAAGCAGTTGGTGGTGCA    |
| PUMA-F            | 65.6           | CGGCCAGCCTGTAAGATAC     |
| PUMA-R            | 61.3           | TTACAGGTAGTGCCAGATGCT   |
| Apaf1-F           | 59.7           | AAAGGAATGCAAAGGTTCTC    |
| Apaf1-R           | 58             | GATGTCTCTCTGAGCATTTC    |
| BAD-F             | 58.7           | CCTTCAAGGGACTTCCTC      |
| BAD-R             | 57.1           | TGTGGAGCAGAAGATCAC      |
| Bax-F             | 60.2           | CCTTTTGTGCTACAGGGTTTC   |
| Bax-R             | 56.5           | ATATTGCTGTCCAGTTCATC    |
| Bcl-F             | 53.6           | ATGACTGAGTACCTGAACC     |
| Bcl-R             | 57.1           | ATATAGTTCCACAAAGGCATC   |
| Casp2-F           | 58.4           | ACAGGAAATGCAAGAGAAAC    |
| Casp- R           | 57             | TTTTGGCTTGTTCTGTAGAC    |
| Casp3-F           | 57.3           | CATAAGAGCACTGGAATGTC    |
| Casp3-R           | 59.5           | GCTCCTTTTGCTATGATCTTC   |
| Casp7-F           | 59.2           | CAAAACCCTGTTAGAGAAACC   |
| Casp7-R           | 57.5           | CCATGAGTAATAACCTGGAAC   |
| Casp8-F           | 54.9           | CAAGAGAACAAGACAGTGAG    |
| Casp8-R           | 55             | ACTCAGAGCCTCTTTATCAC    |
| Casp9-F           | 60.4           | TGATCGAGGATATTCAGCAG    |
| Casp9-R           | 58.2           | CCTCTAAGCAGGAGATGAAG    |

**Table S5.** Conditions and cycles used for RT-qPCR analysis.

| <b>Step</b>              | <b>Temperature</b> | <b>Duration</b> | <b>Cycles</b> |
|--------------------------|--------------------|-----------------|---------------|
| UDG activation           | 50 °C              | 2 minutes       | Hold          |
| Dual-Lock DNA polymerase | 95 °C              | 2 minutes       | Hold          |
| Denature                 | 95 °C              | 15 seconds      | 40            |
| Anneal/extend            | 60 °C              | 1 minutes       |               |
